# Supplementary material for: Conformational degeneracy restricts the effective information content of heparan sulfate
Source: Royal Society of Chemistry journal article supplement (doi:10.1039/b923519a), 2010-02-15
Supplement: b923519a.pdf [file b923519a.pdf]

## Supplementary Data

**Supplementary Table 1** Systematically modified heparins used in the analysis.

| Notation                                         | Position of Substitution     |                              |                              |
|--------------------------------------------------|------------------------------|------------------------------|------------------------------|
|                                                  | I2 / R <sub>1</sub>          | A6 / R <sub>2</sub>          | A2 / R <sub>3</sub>          |
| I <sub>2OH</sub> A <sup>6OH</sup> <sub>NH2</sub> | H                            | H                            | H                            |
| I <sub>2OH</sub> A <sup>6OH</sup> <sub>NS</sub>  | H                            | H                            | SO <sub>3</sub> <sup>-</sup> |
| I <sub>2OH</sub> A <sup>6S</sup> <sub>NS</sub>   | H                            | SO <sub>3</sub> <sup>-</sup> | SO <sub>3</sub> <sup>-</sup> |
| I <sub>2S</sub> A <sup>6S</sup> <sub>NH2</sub>   | SO <sub>3</sub> <sup>-</sup> | SO <sub>3</sub> <sup>-</sup> | H                            |
| I <sub>2S</sub> A <sup>6S</sup> <sub>NAC</sub>   | SO <sub>3</sub> <sup>-</sup> | SO <sub>3</sub> <sup>-</sup> | COCH <sub>3</sub>            |
| I <sub>2S</sub> A <sup>6OH</sup> <sub>NS</sub>   | SO <sub>3</sub> <sup>-</sup> | H                            | SO <sub>3</sub> <sup>-</sup> |
| I <sub>2OH</sub> A <sup>6S</sup> <sub>NH2</sub>  | H                            | SO <sub>3</sub> <sup>-</sup> | H                            |
| I <sub>2OH</sub> A <sup>6S</sup> <sub>NAC</sub>  | H                            | SO <sub>3</sub> <sup>-</sup> | COCH <sub>3</sub>            |
| I <sub>2OH</sub> A <sup>6OH</sup> <sub>NAC</sub> | H                            | H                            | COCH <sub>3</sub>            |
| I <sub>2S</sub> A <sup>6OH</sup> <sub>NH2</sub>  | SO <sub>3</sub> <sup>-</sup> | H                            | H                            |
| I <sub>2S</sub> A <sup>6OH</sup> <sub>NAC</sub>  | SO <sub>3</sub> <sup>-</sup> | H                            | COCH <sub>3</sub>            |
| I <sub>2S</sub> A <sup>6S</sup> <sub>NS</sub>    | SO <sub>3</sub> <sup>-</sup> | SO <sub>3</sub> <sup>-</sup> | SO <sub>3</sub> <sup>-</sup> |

I-N refers to the N<sup>th</sup> position of iduronate and A-N to the N<sup>th</sup> position of glucosamine (aminosugar) residues respectively.

**Supplementary Table 2** <sup>13</sup>C chemical Shift assignments (ppm) for 12 chemically modified heparins

|           | 1     | 2     | 3     | 4     | 5     | 6     | 7     | 8     | 9     | 10    | 11    | 12    |
|-----------|-------|-------|-------|-------|-------|-------|-------|-------|-------|-------|-------|-------|
| <b>A1</b> | 95.8  | 98.2  | 98.1  | 93.7  | 96.6  | 100.0 | 97.9  | 97.1  | 97.1  | 97.2  | 96.8  | 99.5  |
| <b>A2</b> | 57.0  | 60.5  | 60.3  | 57.1  | 56.2  | 60.8  | 57.6  | 56.2  | 56.2  | 58.0  | 56.6  | 60.7  |
| <b>A3</b> | 71.8  | 72.5  | 72.4  | 70.9  | 73.0  | 72.4  | 73.9  | 72.5  | 72.3  | 73.5  | 72.9  | 72.5  |
| <b>A4</b> | 79.0  | 80.2  | 80.1  | 78.2  | 79.3  | 80.5  | 79.6  | 79.6  | 79.6  | 80.1  | 80.6  | 78.8  |
| <b>A5</b> | 74.3  | 73.5  | 71.5  | 72.0  | 72.3  | 73.8  | 72.7  | 71.8  | 73.7  | 74.2  | 74.2  | 72.0  |
| <b>A6</b> | 61.9  | 62.4  | 68.7  | 68.8  | 69.6  | 62.6  | 69.0  | 68.8  | 62.3  | 62.8  | 62.9  | 69.2  |
| <b>I1</b> | 104.5 | 104.3 | 104.6 | 101.3 | 102.2 | 102   | 104.8 | 104.6 | 104.3 | 101.9 | 102.3 | 102.1 |
| <b>I2</b> | 71.7  | 72.2  | 71.1  | 75.3  | 76.8  | 77.6  | 72.9  | 72.0  | 72.5  | 76.0  | 76.6  | 78.9  |
| <b>I3</b> | 71.8  | 71.5  | 70.4  | 65.4  | 67.3  | 70.7  | 72.4  | 71.4  | 72.2  | 67.0  | 67.1  | 72.1  |
| <b>I4</b> | 77.4  | 77.8  | 77.2  | 73.0  | 74.2  | 78.7  | 77.8  | 77.0  | 77.1  | 74.4  | 74.1  | 79.0  |
| <b>I5</b> | 71.8  | 72.2  | 71.2  | 69.8  | 70.8  | 71.4  | 72.8  | 71.9  | 72.6  | 70.1  | 70.6  | 72.3  |

**Supplementary Table 3.** The relative contribution of the first three principal components (c1 (accounting for 38.8 % of the variance in the data), c2 (22.3 %) and c3 (18.5 %) to the range of <sup>13</sup>C chemical shift values observed at the linkage positions among the 12 modified polysaccharides.

| Position | Component 1 | Component 2 | Component 3 |
|----------|-------------|-------------|-------------|
| A1       | 0.05        | 0.87        | 0.04        |
| A4       | 0.02        | 0.19        | 0.51        |
| I1       | 0.98        | 0.02        | -0.01       |
| I4       | 0.52        | 0.84        | 0.02        |

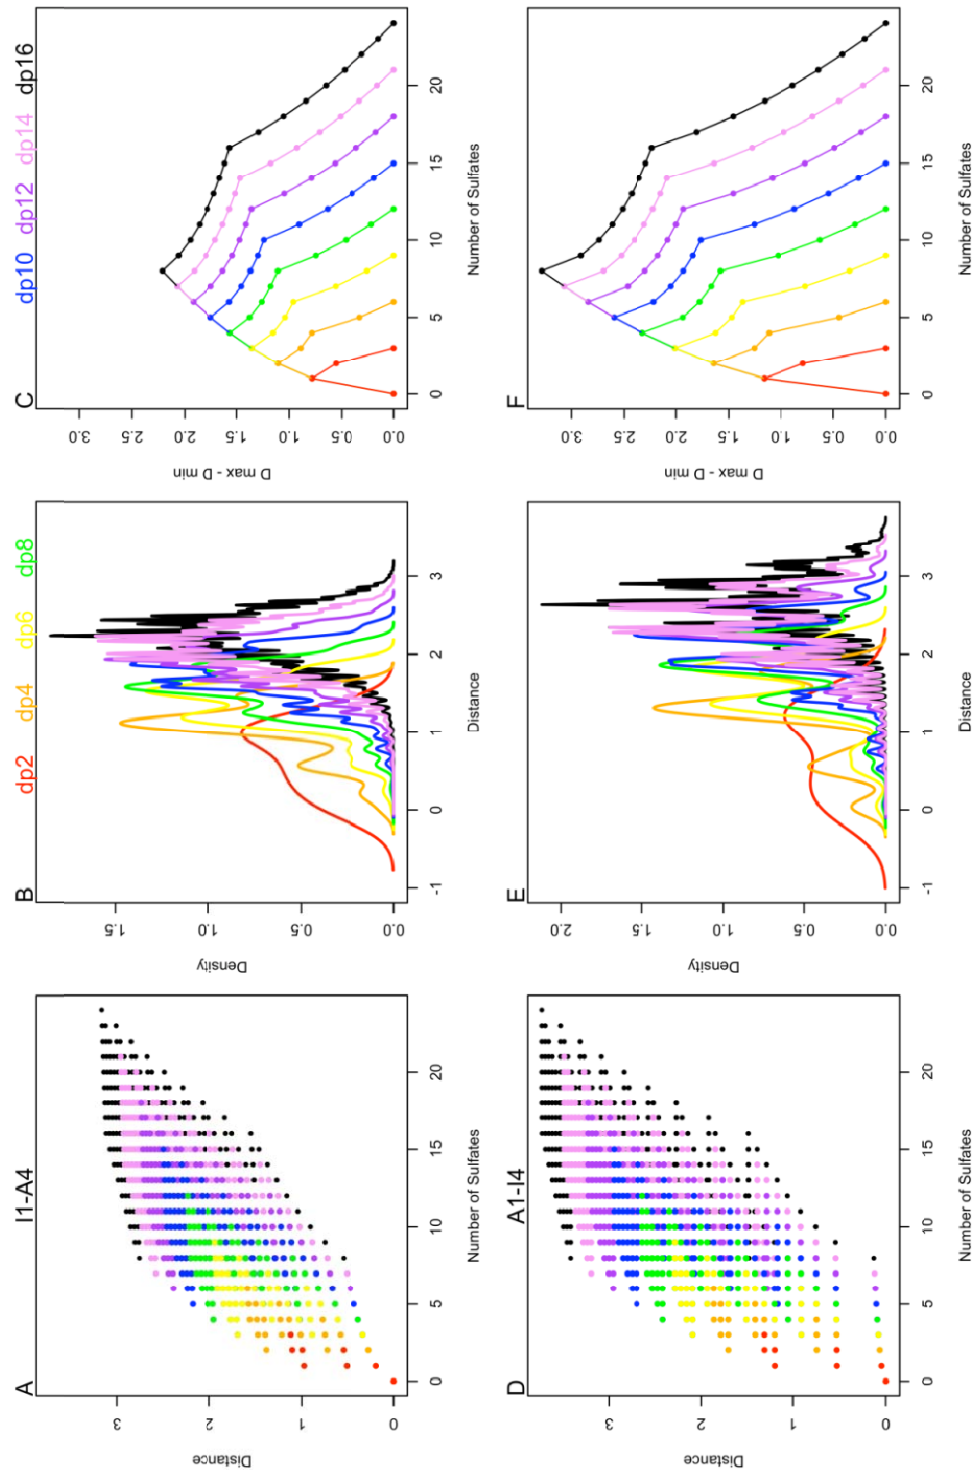

**Supplementary Figure 1.** Greater diversity is evident in A1--I4 linkages than I-1--A-4 linkages. Analysis of variations in individual glycosidic linkages from combinatorial modelling of all possible sequences containing from 2 to 16 residues, A-1, I-4 and I-1, A-4 individually. **A.** (A-1, I-4), **D.** (I-1, A-4) linkage variation against number of sulfates, **B.** (A-1, I-4), **E.** (I-1, A-4) kernel density plots of the linkage variation distributions (in **A.** and **D.**) and **C.** (A-1, I-4), **F.** (I-1, A-4) variation of the linkage distance at every level of sulfation for 2-16 residues.

**Supplementary Table 4** Analysis of the variation in individual glycosidic linkages from combinatorial modelling of all possible oligosaccharide stretches from 2 to 16 residues, linkages A-1, I-4 and I-1, A-4 individually.

**A1-I4**

| residues | <i>Distance</i> |       |         |                    |                                          | <i>Sulfation</i> |      |                          |
|----------|-----------------|-------|---------|--------------------|------------------------------------------|------------------|------|--------------------------|
|          | Mean            | Skew  | Max. D. | M.V.D <sup>a</sup> | N <sup>o</sup> of S that M.V.D occurs at | Mean             | Skew | Max. n <sup>o</sup> of S |
| 2        | 0.77            | -0.31 | 1.32    | 1.16               | 1.0                                      | 1.5              | 0.0  | 3.0                      |
| 4        | 1.22            | -0.82 | 1.86    | 1.64               | 2.0                                      | 3.0              | 0.0  | 6.0                      |
| 6        | 1.54            | -0.88 | 2.28    | 2.01               | 3.0                                      | 4.5              | 0.0  | 9.0                      |
| 8        | 1.81            | -0.80 | 2.63    | 2.32               | 4.0                                      | 6.0              | 0.0  | 12.0                     |
| 10       | 2.04            | -0.70 | 2.94    | 2.60               | 5.0                                      | 7.5              | 0.0  | 15.0                     |
| 12       | 2.24            | -0.62 | 3.23    | 2.84               | 6.0                                      | 9.0              | 0.0  | 18.0                     |
| 14       | 2.43            | -0.56 | 3.48    | 3.07               | 7.0                                      | 10.5             | 0.0  | 21.0                     |
| 16       | 2.60            | -0.51 | 3.72    | 3.28               | 8.0                                      | 12.0             | 0.0  | 24.0                     |

**I1-I4**

| residues | <i>Distance</i> |       |         |                    |                                          | <i>Sulfation</i> |      |                          |
|----------|-----------------|-------|---------|--------------------|------------------------------------------|------------------|------|--------------------------|
|          | Mean            | Skew  | Max. D. | M.V.D <sup>a</sup> | N <sup>o</sup> of S that M.V.D occurs at | Mean             | Skew | Max. n <sup>o</sup> of S |
| 2        | 0.68            | -0.42 | 1.12    | 0.78               | 1.0                                      | 1.5              | 0.0  | 3.0                      |
| 4        | 1.05            | -0.80 | 1.58    | 1.11               | 2.0                                      | 3.0              | 0.0  | 6.0                      |
| 6        | 1.32            | -0.78 | 1.94    | 1.35               | 3.0                                      | 4.5              | 0.0  | 9.0                      |
| 8        | 1.54            | -0.69 | 2.24    | 1.56               | 4.0                                      | 6.0              | 0.0  | 12.0                     |
| 10       | 1.74            | -0.60 | 2.50    | 1.75               | 5.0                                      | 7.5              | 0.0  | 15.0                     |
| 12       | 1.91            | -0.54 | 2.74    | 1.92               | 6.0                                      | 9.0              | 0.0  | 18.0                     |
| 14       | 2.07            | -0.49 | 2.96    | 2.07               | 7.0                                      | 10.5             | 0.0  | 21.0                     |
| 16       | 2.21            | -0.45 | 3.16    | 2.21               | 8.0                                      | 12.0             | 0.0  | 24.0                     |

<sup>a</sup> Maximum Variation in Distance (M.V.D),  $D_{\max} - D_{\min}$  at a specific level of sulfation

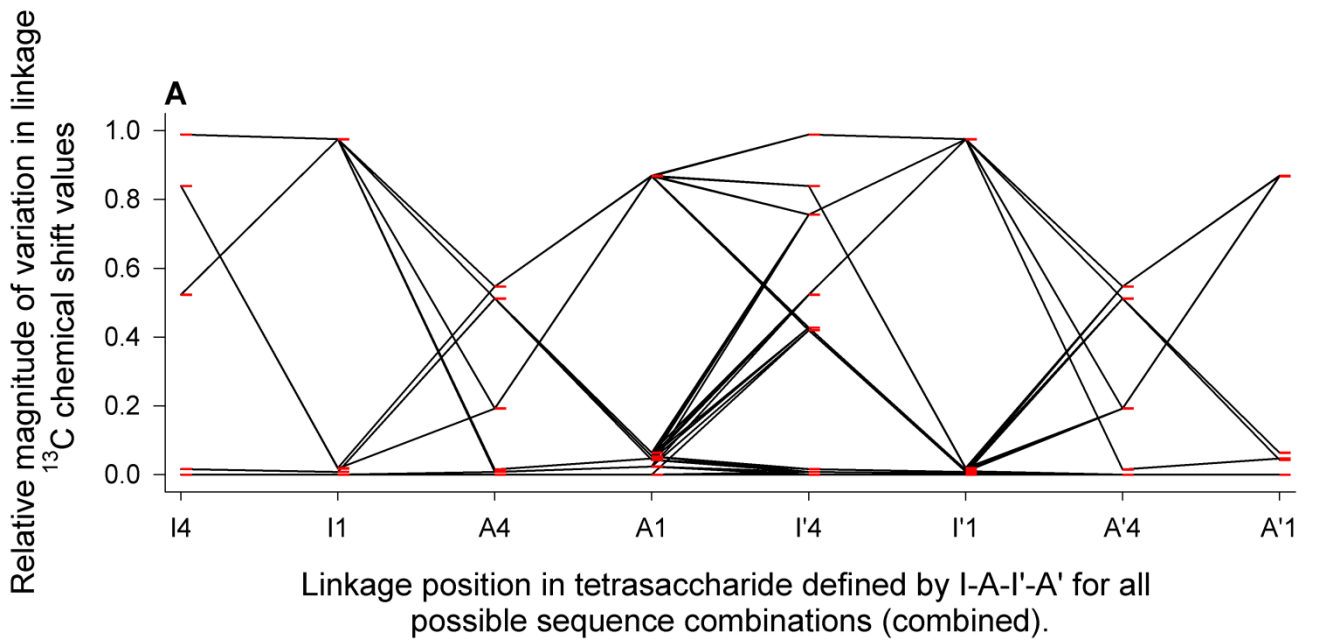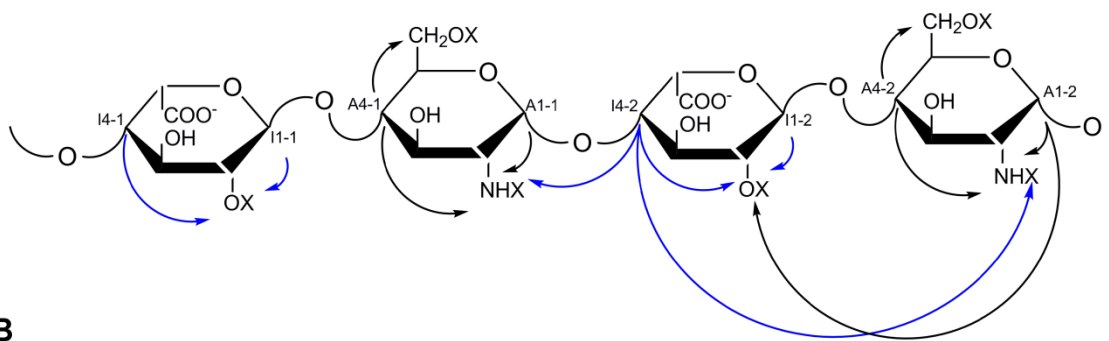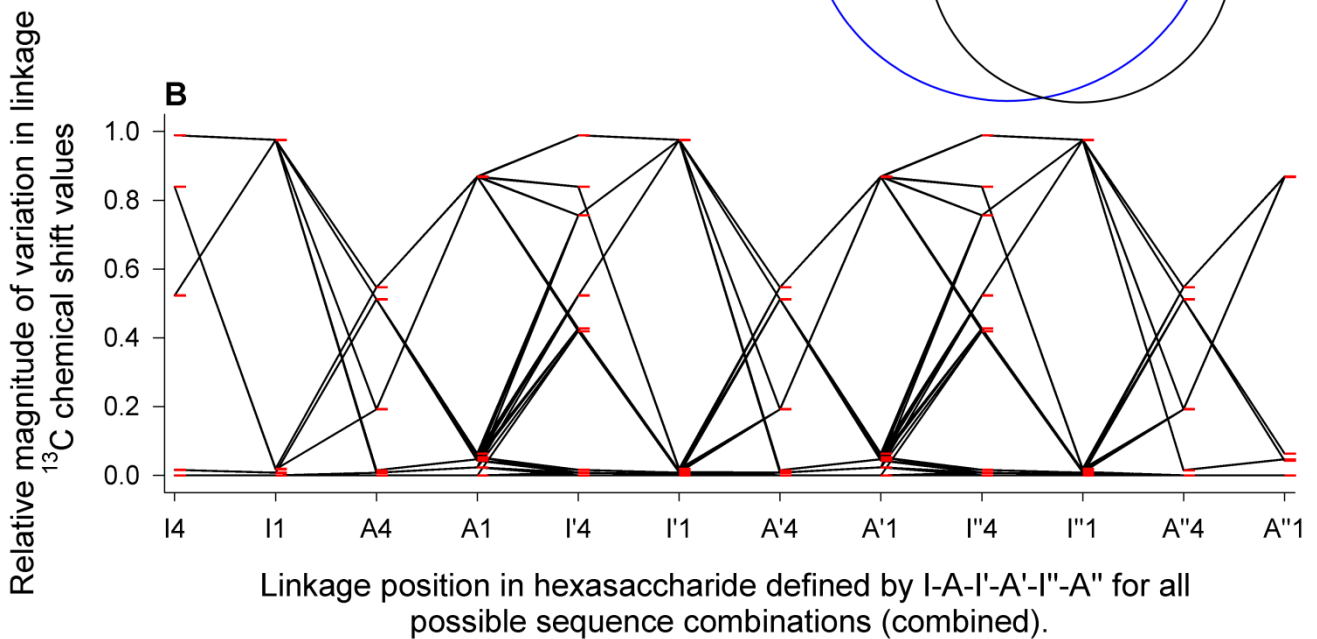

**Supplementary Figure 2.** Distribution of linkage variation (*r.s.s.* distances) along all possible sequence combinations for; **A.** For stretches of 4 residues defined by I-A-I'-A' (superimposed) and **B.** For stretches of 6 residues defined by I-A-I'-A'-I''-A'' (superimposed). The main substitutions influencing the glycosidic linkage positions are also shown in the schematic.

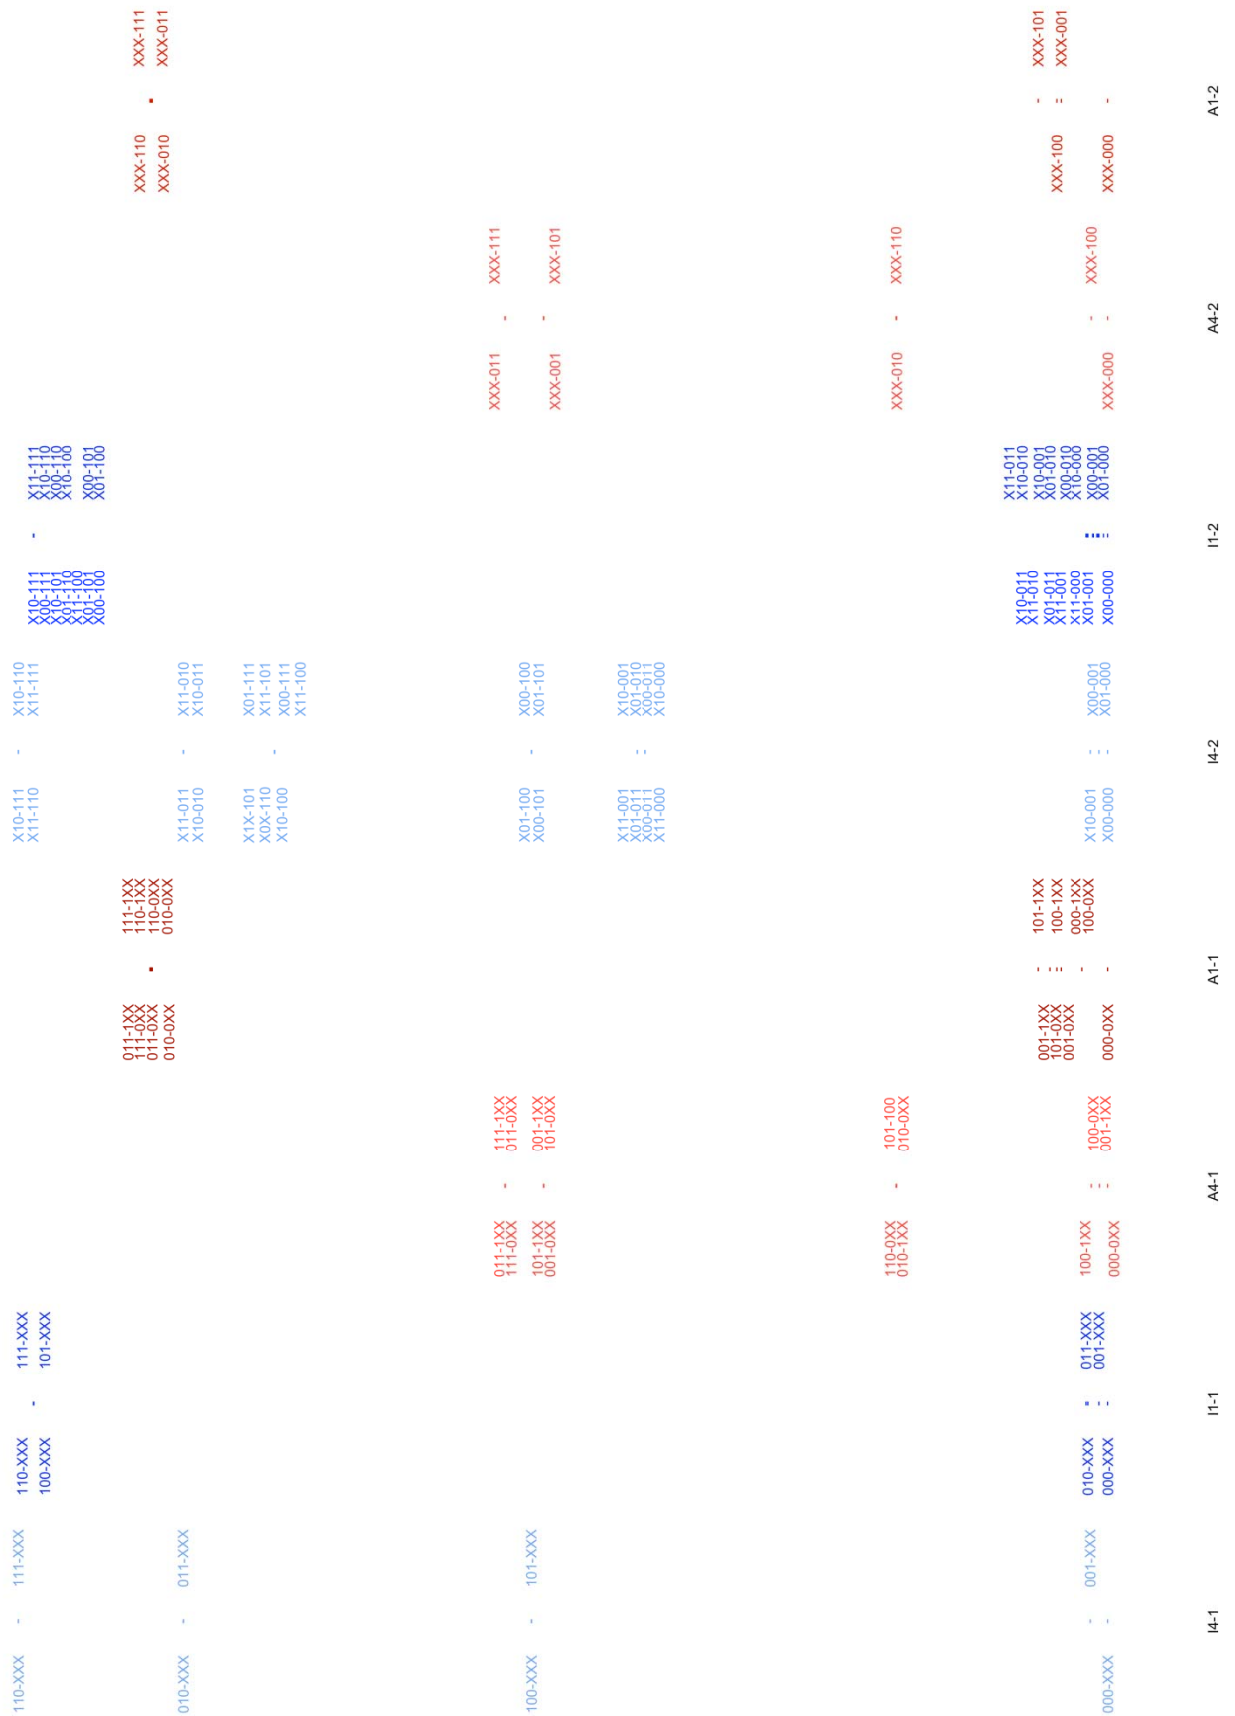

**Supplementary Figure 3** Variability of linkage positions in all possible tetrasaccharide stretches at each linkage position. The vertical axis is the relative magnitude of variation in linkage <sup>13</sup>C chemical shift values.

**Supplementary Table 5** Breakdown of individual linkage variation for all possible sequences of 4 residues

|                | I4-1    |        | I1-1    |        | A4-1               |        | A1-1               |        | I4-2                                     |        | I1-2                          |        | A4-2    |        | A1-2    |        |
|----------------|---------|--------|---------|--------|--------------------|--------|--------------------|--------|------------------------------------------|--------|-------------------------------|--------|---------|--------|---------|--------|
|                | SEQ     | VAR    | SEQ     | VAR    | SEQ                | VAR    | SEQ                | VAR    | SEQ                                      | VAR    | SEQ                           | VAR    | SEQ     | VAR    | SEQ     | VAR    |
|                | 000-XXX | 0.0001 | 000-XXX | 0.0001 | 000-0XX            | 0.0001 | 000-0XX            | 0.0001 | X00-000                                  | 0.0001 | X00-000                       | 0.0001 | XXX-000 | 0.0001 | XXX-000 | 0.0001 |
|                | 001-XXX | 0.0160 | 001-XXX | 0.0080 | 000-1XX<br>100-0XX | 0.0076 | 100-0XX<br>000-1XX | 0.0236 | X01-000<br>X00-001                       | 0.0081 | X01-000<br>X00-001            | 0.0041 | XXX-100 | 0.0150 | XXX-001 | 0.0430 |
|                | 100-XXX | 0.5230 | 010-XXX | 0.0180 | 100-1XX            | 0.0150 | 001-0XX            | 0.0430 | X10-001                                  | 0.0160 | X01-001                       | 0.0080 | XXX-010 | 0.1920 | XXX-100 | 0.0470 |
|                | 101-XXX | 0.5232 | 011-XXX | 0.0197 | 010-0XX            | 0.1920 | 100-1XX            | 0.0470 | X10-000<br>X00-010                       | 0.4196 | X10-000<br>X00-010            | 0.0091 | XXX-110 | 0.1926 | XXX-101 | 0.0637 |
|                | 010-XXX | 0.8390 | 100-XXX | 0.9750 | 010-1XX<br>110-0XX | 0.1923 | 101-0XX<br>001-1XX | 0.0534 | X11-000<br>X00-011                       | 0.4196 | X11-000                       | 0.0099 | XXX-001 | 0.5120 | XXX-010 | 0.8670 |
|                | 011-XXX | 0.8392 | 101-XXX | 0.9750 | 101-100            | 0.1926 | 101-1XX            | 0.0637 | X01-010<br>X10-001                       | 0.4275 | X01-010<br>X10-001            | 0.0130 | XXX-101 | 0.5122 | XXX-011 | 0.8681 |
|                | 110-XXX | 0.9887 | 110-XXX | 0.9752 | 001-0XX            | 0.5120 | 010-0XX            | 0.8670 | X11-001<br>X01-011                       | 0.4276 | X11-001<br>X01-011            | 0.0138 | XXX-011 | 0.5468 | XXX-110 | 0.8683 |
|                | 111-XXX | 0.9888 | 111-XXX | 0.9752 | 101-0XX<br>001-1XX | 0.5121 | 110-0XX<br>010-0XX | 0.8676 | X00-100                                  | 0.5230 | X10-010                       | 0.0180 | XXX-111 | 0.5470 | XXX-111 | 0.8693 |
|                |         |        |         |        | 101-1XX            | 0.5122 | 011-0XX            | 0.8681 | X01-100<br>X00-101                       | 0.5231 | X11-010<br>X10-011            | 0.0188 |         |        |         |        |
|                |         |        |         |        | 011-0XX            | 0.5468 | 110-1XX            | 0.8683 | X01-101                                  | 0.5232 | X11-011                       | 0.0197 |         |        |         |        |
|                |         |        |         |        | 111-0XX<br>011-1XX | 0.5469 | 111-0XX<br>011-1XX | 0.8687 | X10-100                                  | 0.7558 | X00-100                       | 0.9750 |         |        |         |        |
|                |         |        |         |        | 111-1XX            | 0.5470 | 111-1XX            | 0.8693 | X11-100<br>X00-111<br>X0X-110<br>X1X-101 | 0.7559 | X01-100<br>X00-101            | 0.9750 |         |        |         |        |
|                |         |        |         |        |                    |        |                    |        | X11-101<br>X01-111                       | 0.7560 | X10-100<br>X00-110            | 0.9751 |         |        |         |        |
|                |         |        |         |        |                    |        |                    |        | X10-010                                  | 0.8390 | X01-110<br>X10-101<br>X00-111 | 0.9751 |         |        |         |        |
|                |         |        |         |        |                    |        |                    |        | X11-010<br>X10-011                       | 0.8391 | X10-110                       | 0.9752 |         |        |         |        |
|                |         |        |         |        |                    |        |                    |        | X11-011                                  | 0.8392 | X10-111                       | 0.9752 |         |        |         |        |
|                |         |        |         |        |                    |        |                    |        | X10-110                                  | 0.9887 | X11-111                       | 0.9752 |         |        |         |        |
|                |         |        |         |        |                    |        |                    |        | X11-110<br>X10-111                       | 0.9887 |                               |        |         |        |         |        |
|                |         |        |         |        |                    |        |                    |        | X11-111                                  | 0.9888 |                               |        |         |        |         |        |
| <i>Min Var</i> | 000-XXX |        | 000-XXX |        | 000-0XX            |        | 000-0XX            |        | X00-000                                  |        | X00-000                       |        | XXX-000 |        | XXX-000 |        |
| <i>Max Var</i> | 11X-XXX |        | 11X-XXX |        | X1X-XXX            |        | X1X-XXX            |        | X1X-11X                                  |        | XXX-1XX                       |        | XXX-X11 |        | XXX-X1X |        |

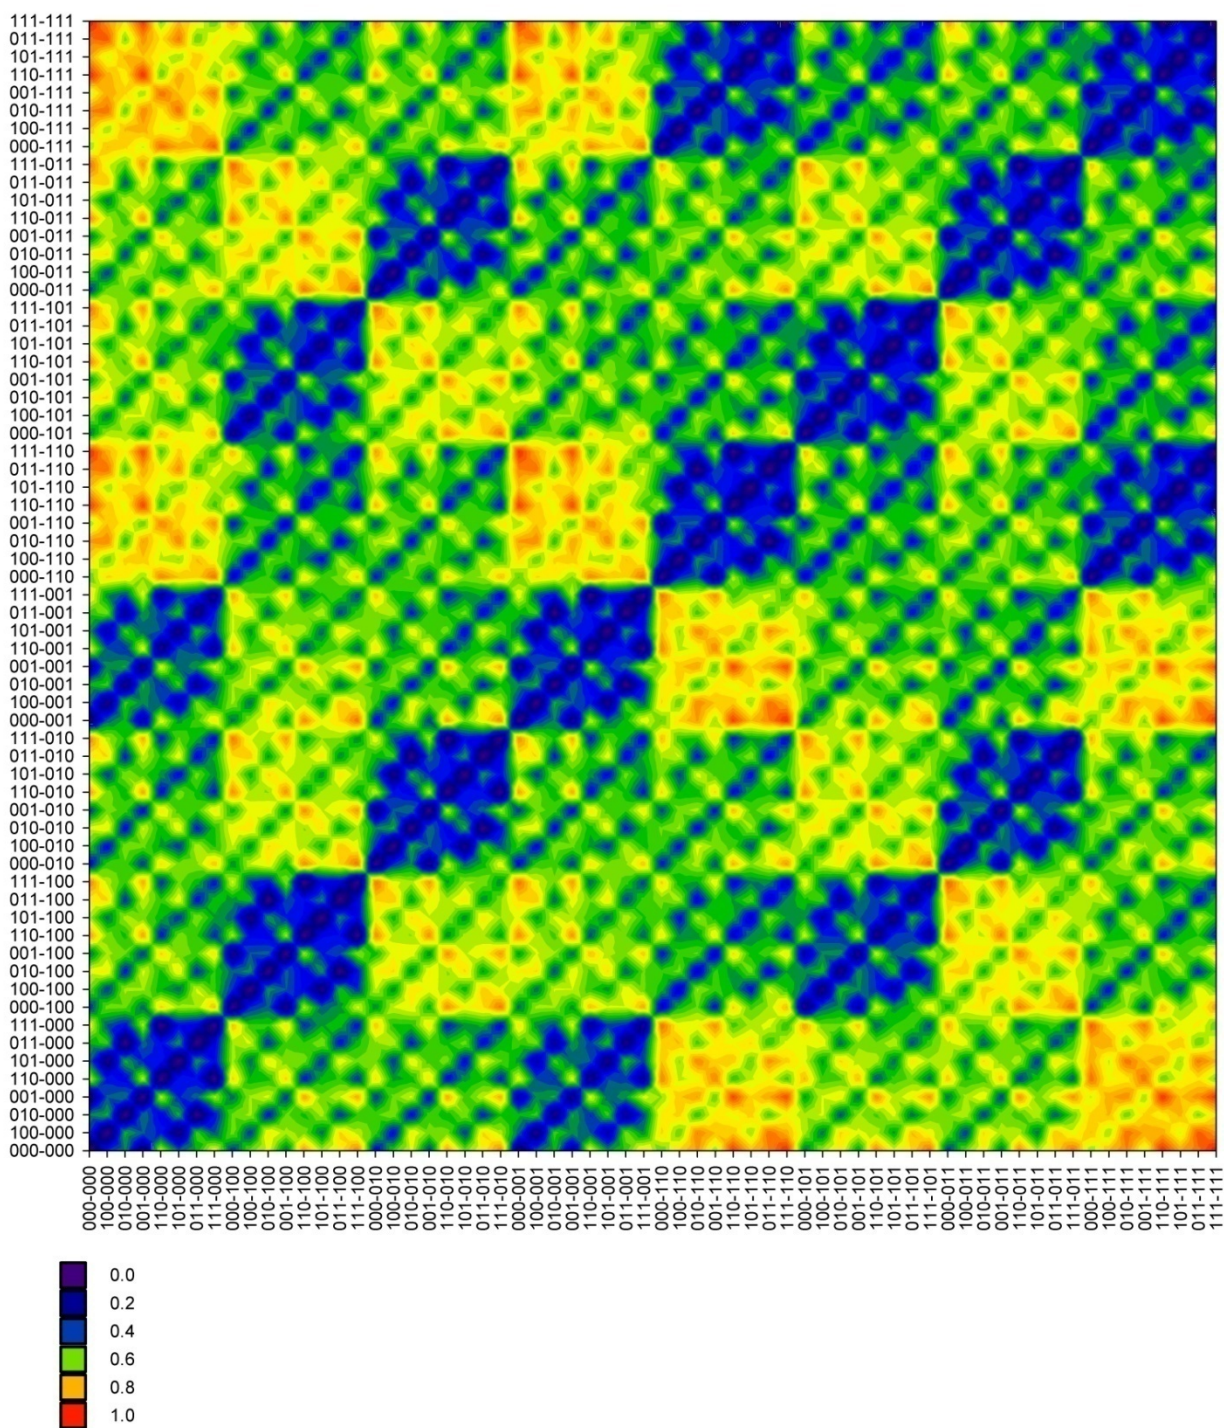

**Supplementary Figure 4A** Dissimilarities between all stretches of 4 residues running in the same direction. The geometric patterning is the results of the grouping of structures along the axes and systematic changes between members of the groups (diagonal lines). The data are symmetrical about the diagonal [running bottom left to top right], with zero dissimilarity on the diagonal when each sequence is compared with itself. Deep blue-purple

(representing 0.0) signifies complete similarity, while red (representing 1.0) signifies complete dissimilarity.

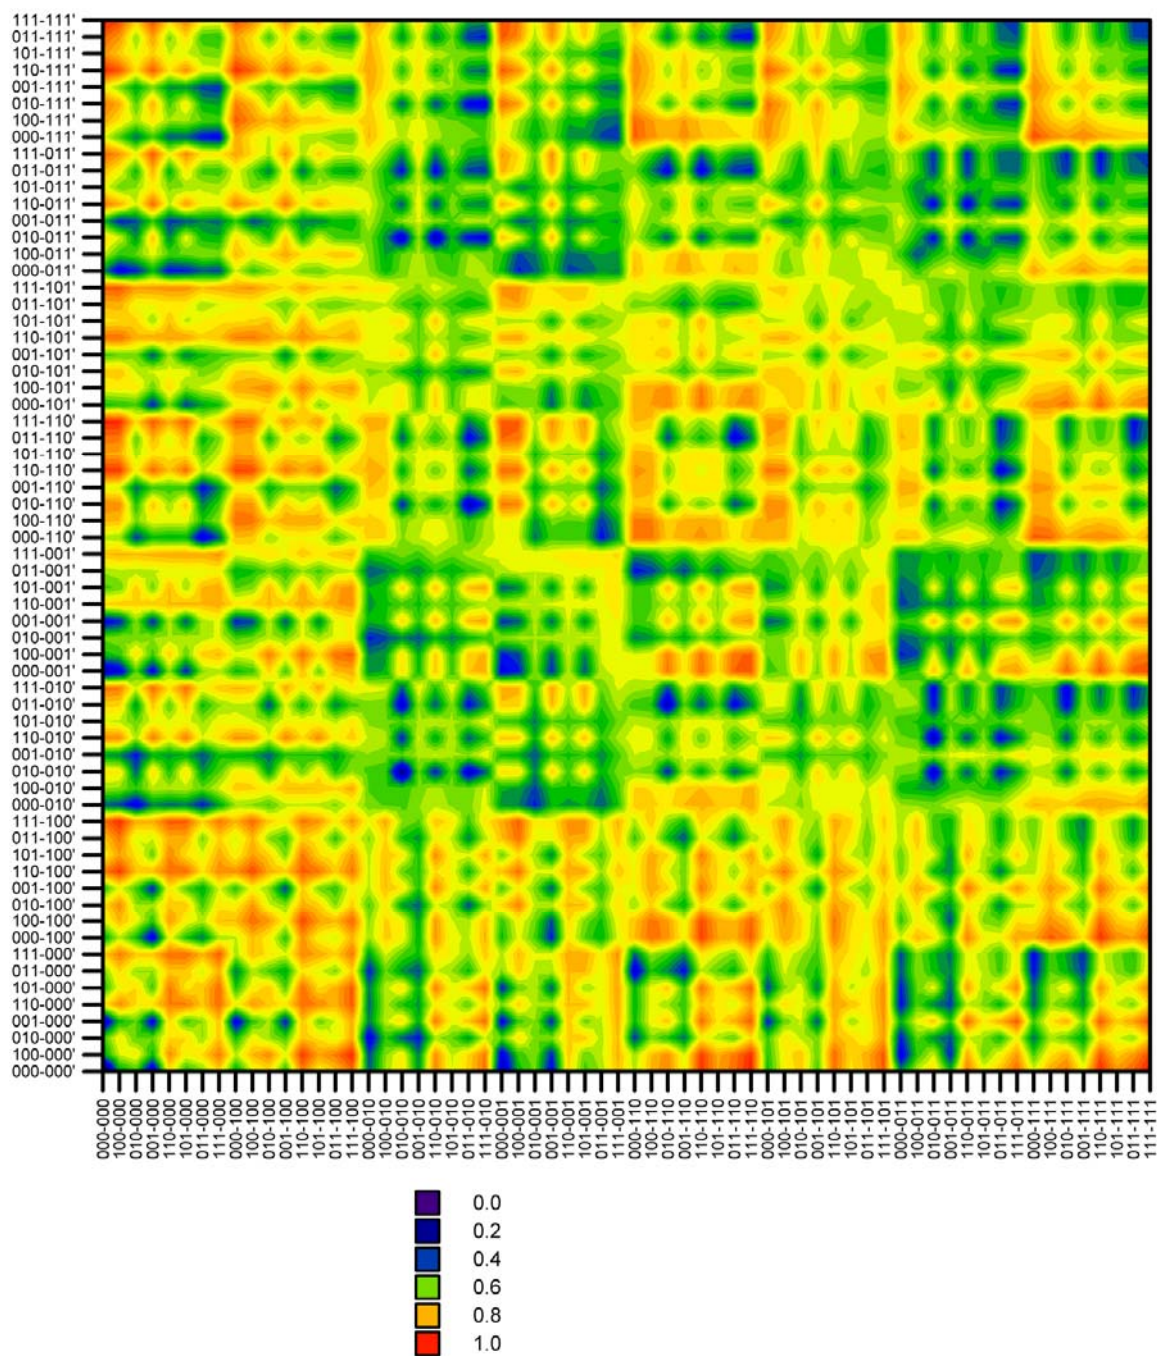

**Supplementary Figure 4B** Dissimilarities between all stretches of 4 residues running in opposite directions. The geometric patterning is the result of the grouping of structures along the axes. XXX-XXX' signifies the reverse structures, so the linkage order runs A1-4, A4-4, I1-3, I4-3, A1-2, A4-2, I1-1, I4-1 instead of I4-1, I1-1, A4-2, A1-2, I4-3, I1-3, A4-4, A1-4.



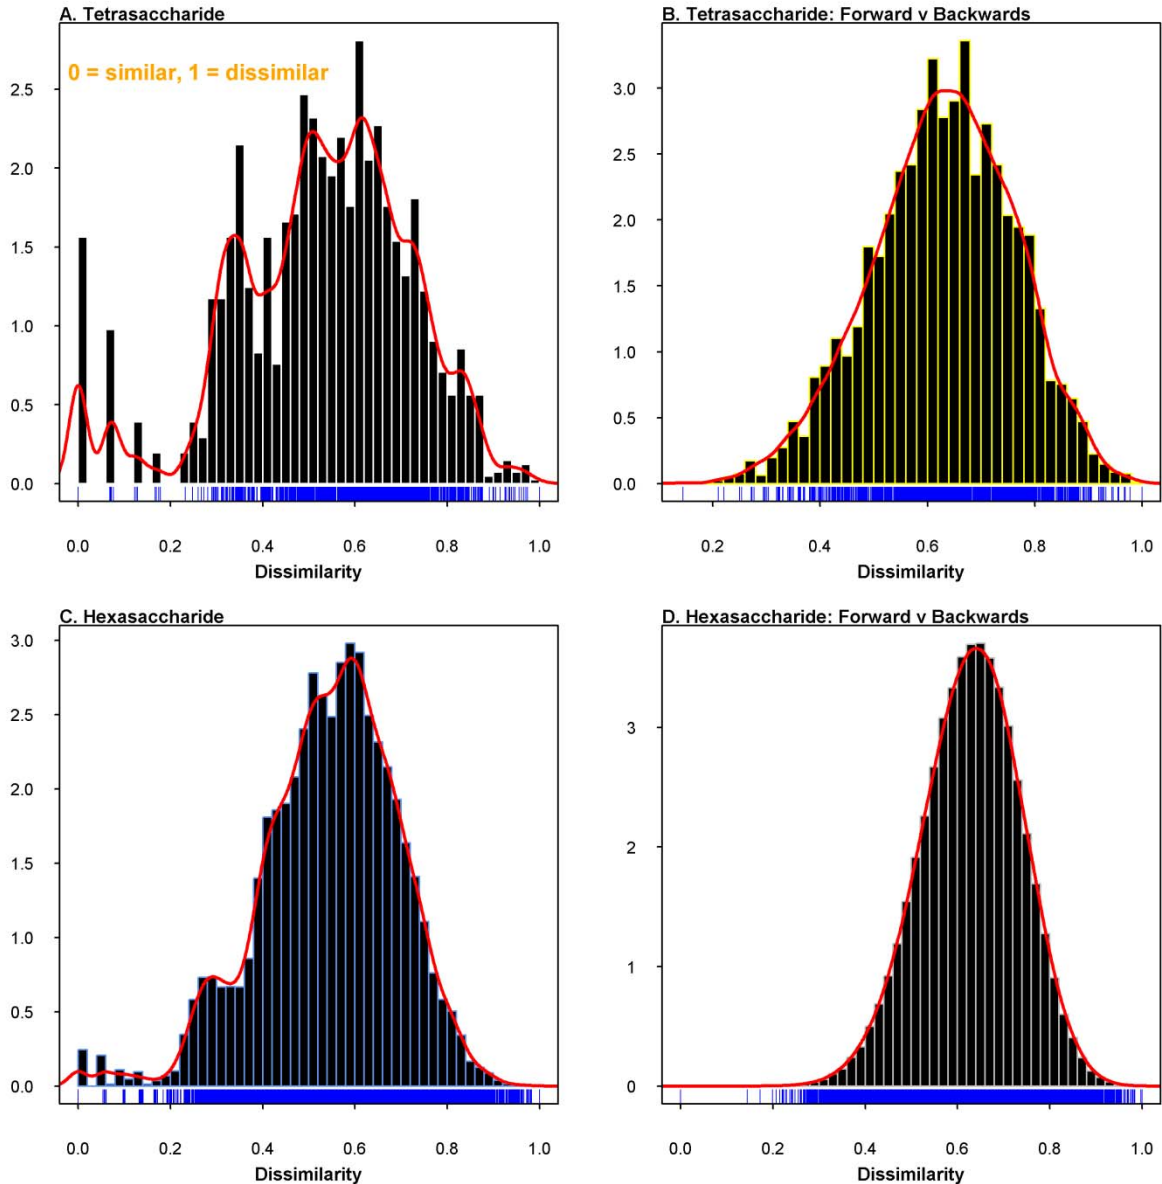

**Supplementary Figure 5** Histogram of the dissimilarity values for all stretches of 4 residues and 6 residues running in the same direction and the comparison of forward and backwards measuring dissimilarity along the sequence, rather than overall variation in the linkage.

### Dissimilarity Calculation

Dissimilarities were calculated using SPSS [proximity algorithm], which is a comparison of Euclidean distances from an origin between two samples, the values being scaled to the range 0 to 1, (with 0 being similar and 1 dissimilar). So, for example, the dissimilarities between two disaccharides I4a, I1a, A4a, A1a and I4b, I1b, A4b, A1b is:

$$D_{a,b} = \sqrt{(I4a - I4b)^2 + (I1a - I1b)^2 + (A4a - A4b)^2 + (A1a - A1b)^2}$$

In general;

$$D_{ij}^2 = \sum_{v=1}^n (x_i - x_j)^2$$
